# Supplementary material for: In depth analysis of patients with severe SARS-CoV-2 in sub-Saharan Africa demonstrates distinct clinical and immunological profiles
Source: PubMed Central journal article supplement (PMC7899472; doi:10.1101/2021.02.15.21251753), 2021-02-20

Figure S1

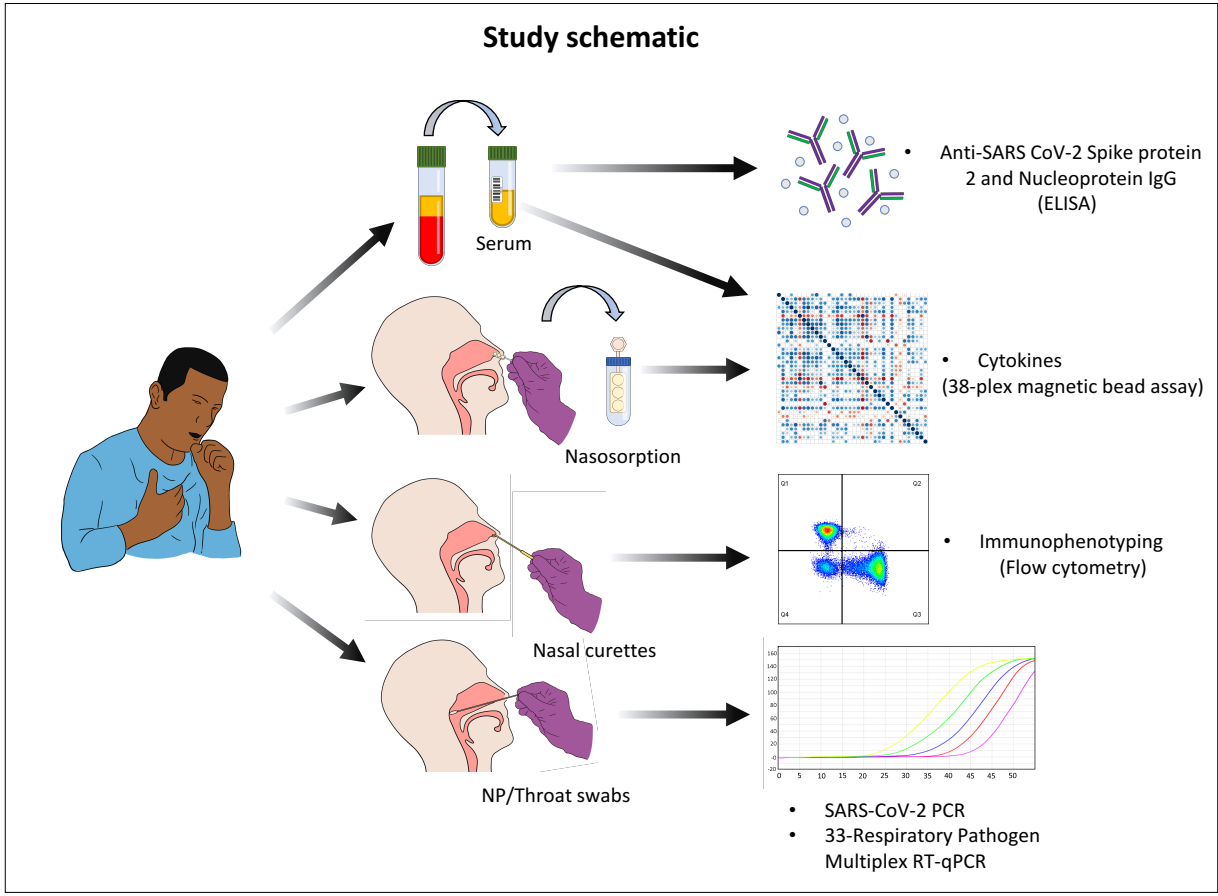

Figure S2

Nasal lining fluid

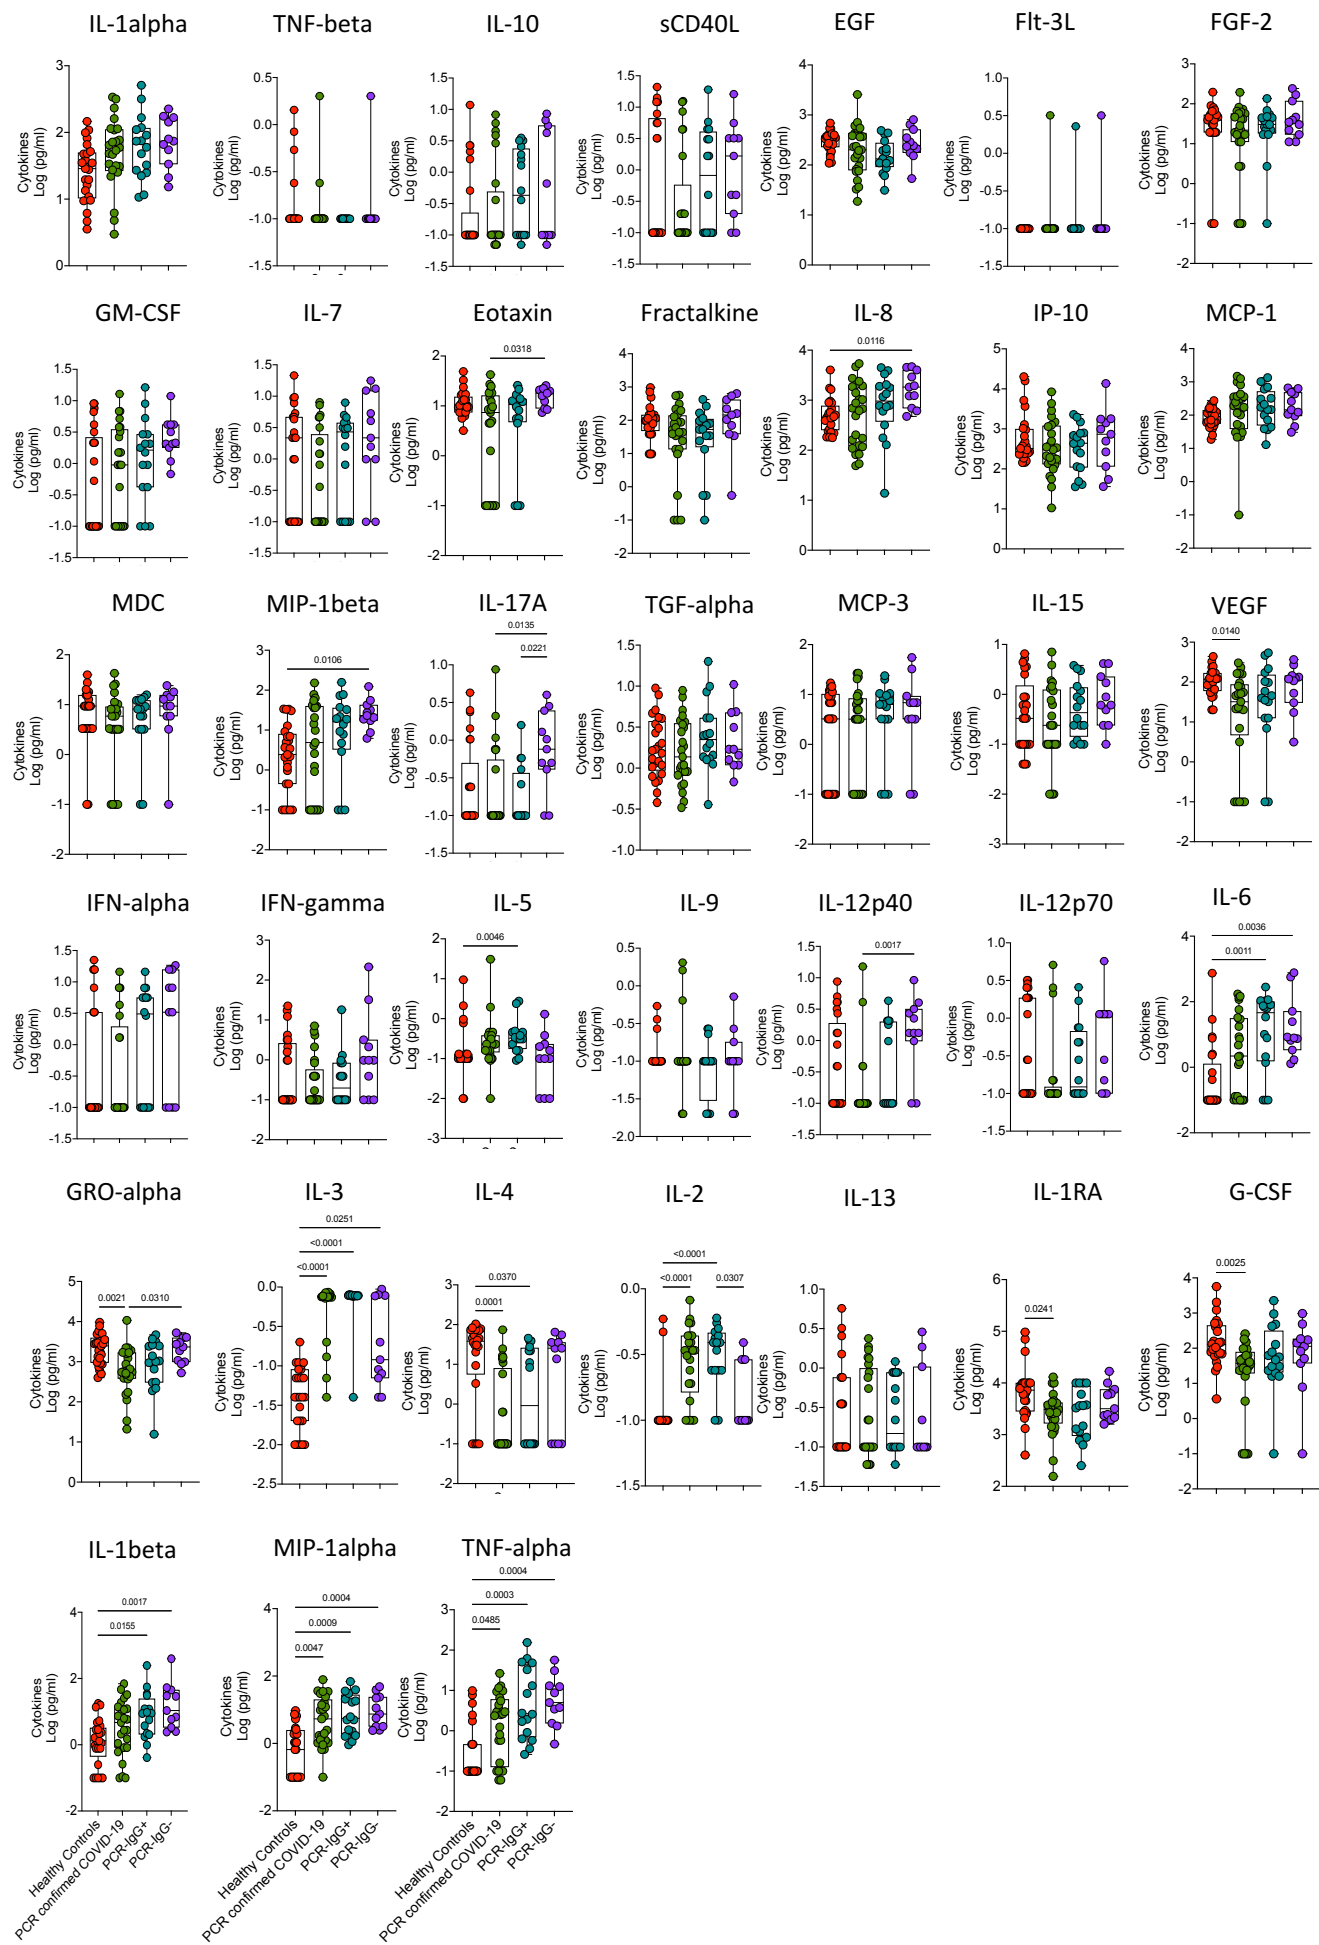

Figure S3

Serum

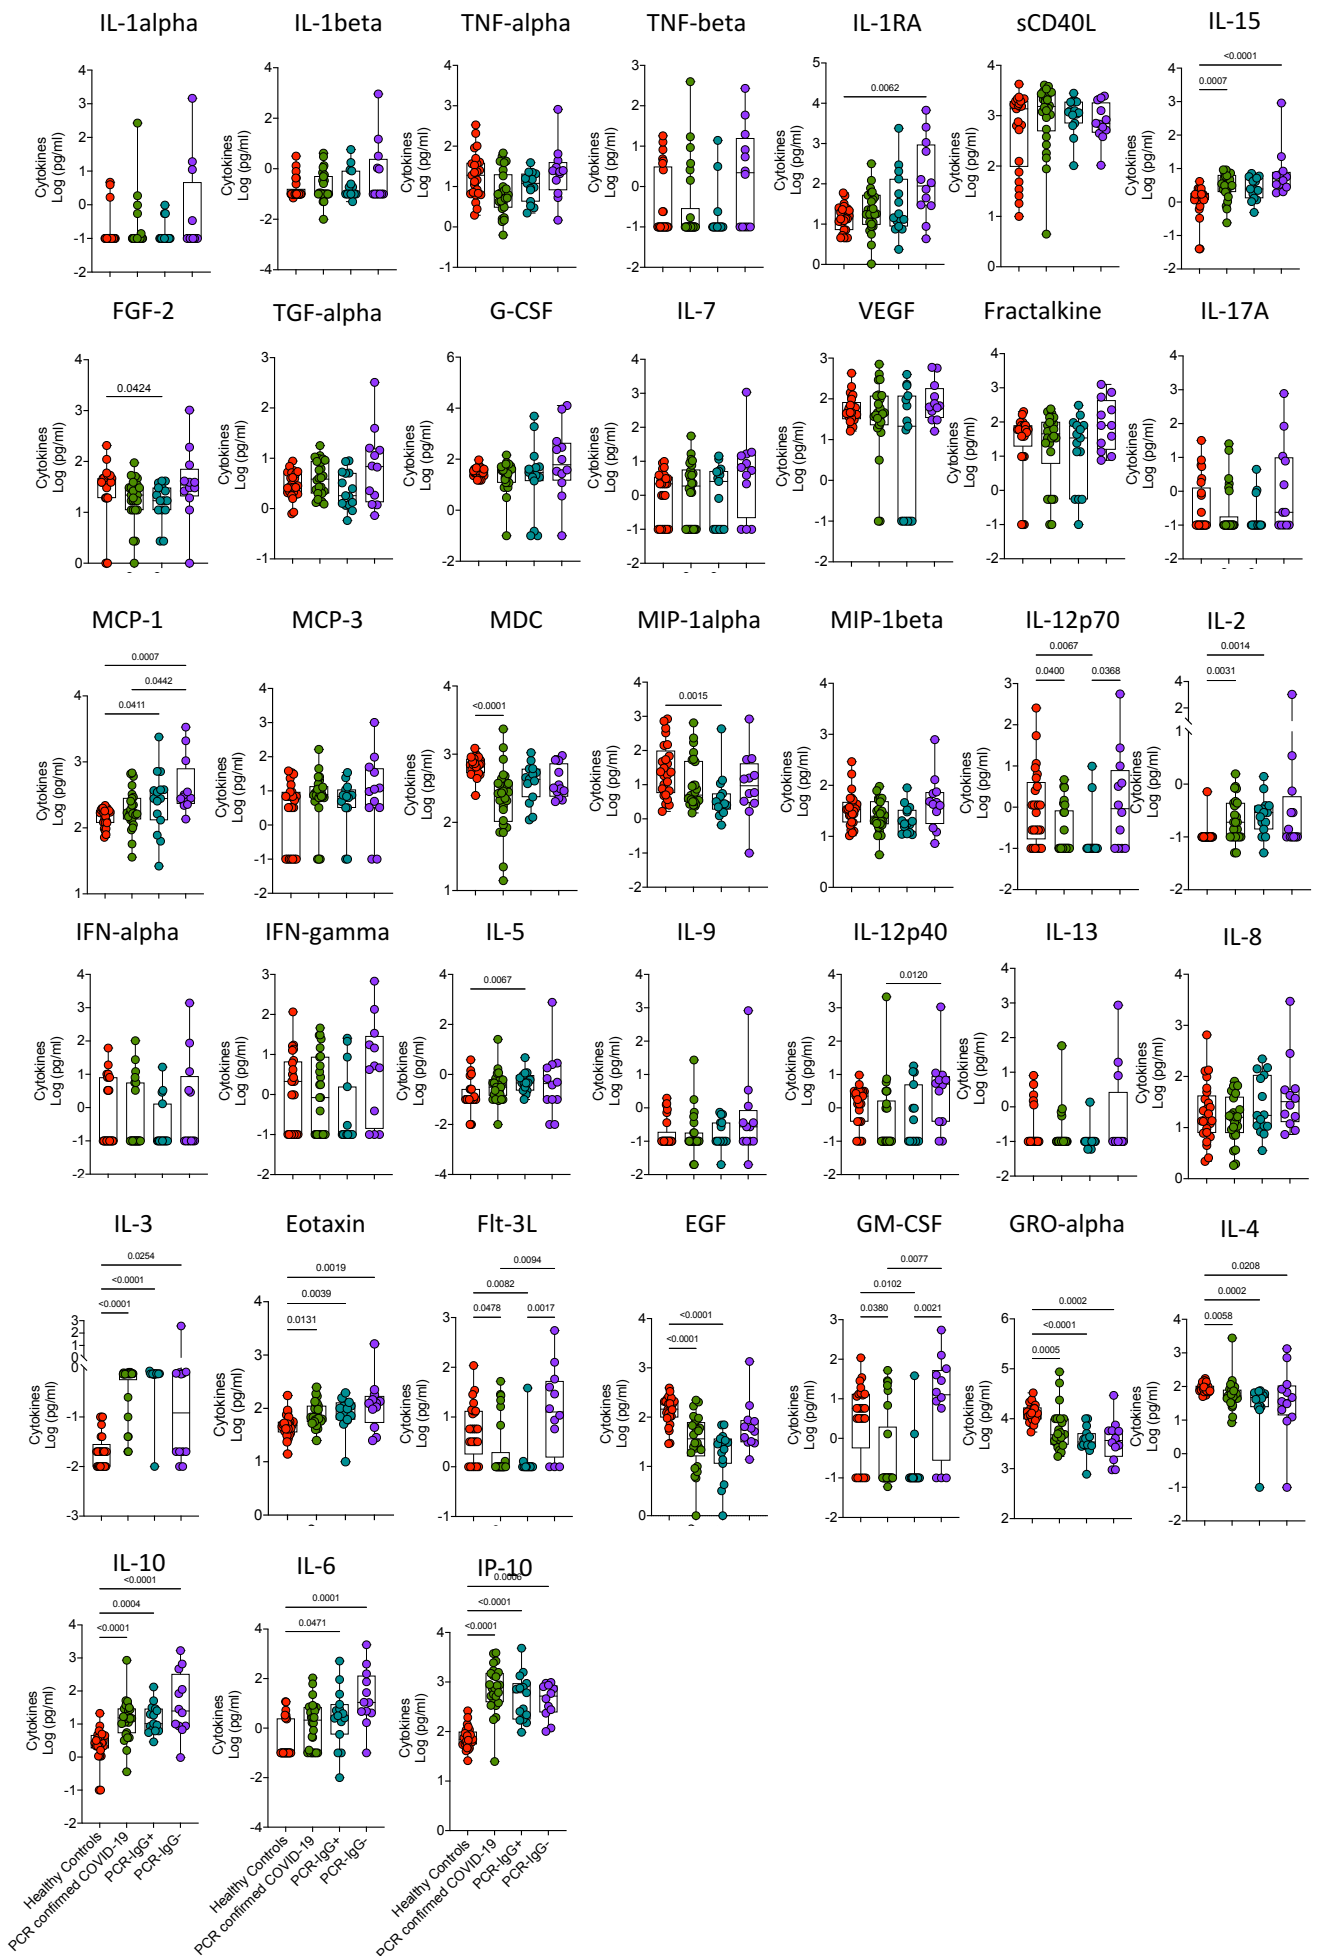

Figure S4

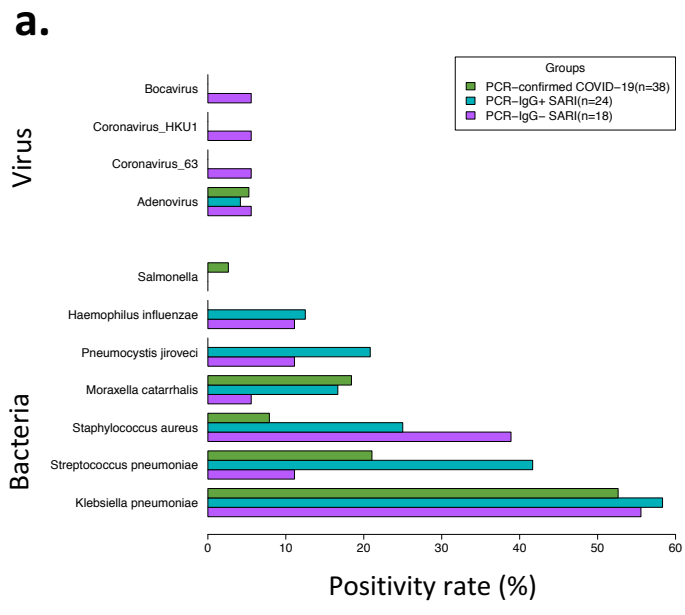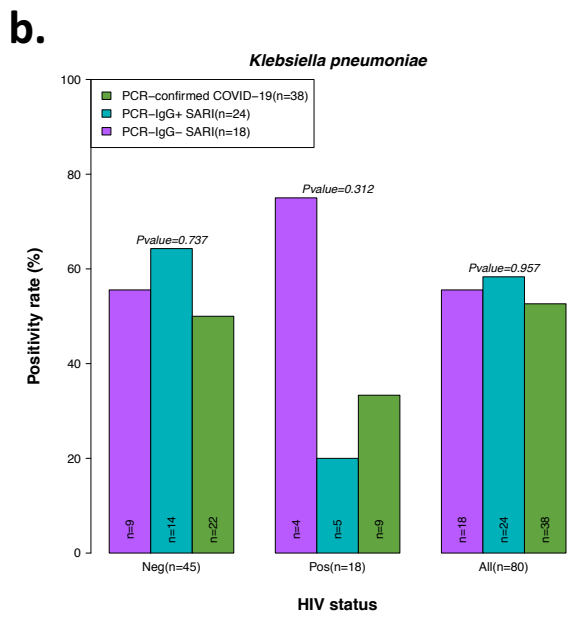

Supplement: media-1.pdf [file media-1.pdf]
